# Supplementary material for: Effects of playing position, pitch location, opposition ability and team ability on the technical performance of elite soccer players in different score line states
Source: PLOS journal article supplement (doi:10.1371/journal.pone.0211707), 2019-02-05
Supplement: S1 (10.1371/journal.pone.0211707.s001) [file journal.pone.0211707.s001]

## S1 File. Prediction Equation Examples

Prediction equations associated with Tables 2, 3 and 4 are given below:

1. Prediction equation for pass accuracy for a midfielder in the middle 3<sup>rd</sup>, playing for a team ranked 10<sup>th</sup>, who are losing by 2 goals, away from home is:  $\text{Pass Accuracy} = \text{Constant} + (\beta_1 * \text{goal difference centered at } 0) + (\beta_2 * \text{goal difference centered at } 0^2) + (\beta_3 * \text{midfielder}) + (\beta_4 * \text{middle } 3^{\text{rd}}) + (\beta_5 * \text{team ability centered at rank } 10)$  which is:  $0.793 + (-0.012 * -2) + (0.003 * -2^2) + (0.025) + (0.050) + (-0.006 * 9) = 0.838$  resulting in a passing accuracy of 83.8%.
2. The prediction equation for corner accuracy for a team ranked 10<sup>th</sup>, who are winning by 2 goals away from home is:  $\text{Corner Accuracy} = \text{Constant} + (\beta_1 * \text{goal difference centered at } 0) + (\beta_2 * \text{goal difference centered at } 0^2) + (\beta_3 * \text{team ability centered at rank } 10)$  which is:  $0.516 + (0.018 * 2) + (0.017 * 2^2) + (-0.008 * 9) = 0.481$  resulting in a corner accuracy of 48.1%.
3. The prediction equation for free kick accuracy playing at home, in the middle 3<sup>rd</sup>, for a striker playing for a team ranked 10<sup>th</sup> in all goal differences is:  $\text{Constant} + (\beta_1 * \text{middle } 3^{\text{rd}}) + (\beta_2 * \text{striker}) + (\beta_3 * \text{team ability rank } 10)$  which is:  $0.508 + (0.378) + (-0.106) + (-0.010 * 9) = 0.69$  resulting in a free kick accuracy of 69.0%.
